# Supplementary material for: Tuberculosis among Full-Time Teachers in Southeast China, 2005–2016
Source: PubMed Central journal article supplement (PMC6163467; doi:10.3390/ijerph15092024), 2018-09-17
Supplement: ijerph-15-02024-s001.pdf [file ijerph-15-02024-s001.pdf]

Table S1. Age composition of reported tuberculosis cases among full-time teachers in Zhejiang province, 2005-2016.

| Year  | <30             |                | 30-39           |                | 40-49           |                | 50-59           |                | ≥60             |                |
|-------|-----------------|----------------|-----------------|----------------|-----------------|----------------|-----------------|----------------|-----------------|----------------|
|       | No. of Patients | Proportion (%) | No. of Patients | Proportion (%) | No. of Patients | Proportion (%) | No. of Patients | Proportion (%) | No. of Patients | Proportion (%) |
| 2005  | 66              | 32.04          | 50              | 24.27          | 33              | 16.02          | 26              | 12.62          | 31              | 15.05          |
| 2006  | 68              | 32.23          | 59              | 27.96          | 24              | 11.37          | 34              | 16.11          | 26              | 12.32          |
| 2007  | 54              | 31.40          | 32              | 18.60          | 25              | 14.53          | 38              | 22.09          | 23              | 13.37          |
| 2008  | 51              | 30.00          | 41              | 24.12          | 25              | 14.71          | 31              | 18.24          | 22              | 12.94          |
| 2009  | 41              | 29.29          | 37              | 26.43          | 28              | 20.00          | 20              | 14.29          | 14              | 10.00          |
| 2010  | 45              | 30.20          | 48              | 32.21          | 25              | 16.78          | 18              | 12.08          | 13              | 8.72           |
| 2011  | 63              | 43.15          | 28              | 19.18          | 26              | 17.81          | 22              | 15.07          | 7               | 4.79           |
| 2012  | 51              | 36.17          | 45              | 31.91          | 25              | 17.73          | 13              | 9.22           | 7               | 4.96           |
| 2013  | 43              | 38.39          | 35              | 31.25          | 17              | 15.18          | 12              | 10.71          | 5               | 4.46           |
| 2014  | 37              | 32.17          | 34              | 29.57          | 17              | 14.78          | 19              | 16.52          | 8               | 6.96           |
| 2015  | 37              | 30.33          | 46              | 37.70          | 16              | 13.11          | 18              | 14.75          | 5               | 4.10           |
| 2016  | 31              | 27.93          | 36              | 32.43          | 24              | 21.62          | 14              | 12.61          | 6               | 5.41           |
| Total | 587             | 32.68          | 491             | 27.34          | 285             | 15.87          | 265             | 14.76          | 167             | 9.30           |

Table S2. Relationships between clinical classifications of TB and demographic factors.

| Factors    | Clinical Classification of TB |                    |          |          |                   |             |          |          |
|------------|-------------------------------|--------------------|----------|----------|-------------------|-------------|----------|----------|
|            | Smear Positive (%)            | Smear Negative (%) | $\chi^2$ | <i>P</i> | Initial Treatment | Retreatment | $\chi^2$ | <i>P</i> |
| Gender     |                               |                    |          |          |                   |             |          |          |
| Male       | 226 (29.70)                   | 535 (70.30)        | 1.89     | 0.17     | 804 (92.00)       | 70 (8.00)   | 11.20    | <0.01**  |
| Female     | 212 (26.60)                   | 586 (73.40)        |          |          | 882 (95.80)       | 39 (4.20)   |          |          |
| Age        |                               |                    |          |          |                   |             |          |          |
| <30        | 151 (28.80)                   | 373 (71.20)        | 25.14    | <0.01    | 563 (95.90)       | 24 (4.10)   | 18.65    | <0.01**  |
| 30-39      | 96 (22.50)                    | 330 (77.50)        |          |          | 467 (95.10)       | 24 (4.90)   |          |          |
| 40-49      | 65 (27.50)                    | 171 (72.50)        |          |          | 267 (93.70)       | 18 (6.30)   |          |          |
| 50-59      | 61 (27.10)                    | 164 (72.90)        |          |          | 242 (91.30)       | 23 (8.70)   |          |          |
| ≥60        | 65 (43.90)                    | 83 (56.10)         |          |          | 147 (88.00)       | 20 (12.00)  |          |          |
| Habitation |                               |                    |          |          |                   |             |          |          |
| Local      | 410 (27.90)                   | 1057 (72.10)       | 0.26     | 0.61     | 1588 (93.90)      | 104 (6.10)  | 0.28     | 0.59     |
| Not local  | 28 (30.40)                    | 64 (69.60)         |          |          | 98 (95.10)        | 5 (4.90)    |          |          |

Note: \*\*  $p < 0.01$ .
